# Supplementary material
Source: PubMed Central journal article supplement (PMC2040905)
Supplement: pnas_0704964104_3.pdf [file pnas_0704964104_3.pdf]

**Table I. FAST binary interactions**

| Biological process / protein (description)                                    | GeneID | co-IP |
|-------------------------------------------------------------------------------|--------|-------|
| <b>DNA transcription</b>                                                      |        |       |
| CBFA2T2 (Core-binding factor, runt domain, $\alpha$ subunit 2)                | 9139   |       |
| HSFX1 (Heat shock transcription factor family, X linked 1)                    | 51402  |       |
| RBCK1 (RanBP-type and C3HC4-type zinc finger-containing 1)                    | 10616  | +     |
| RUNX1T1 (Runt-related transcription factor 1; cyclin D-related)               | 862    |       |
| TMF1 (TATA element modulatory factor 1)                                       | 7110   |       |
| <b>RNA splicing</b>                                                           |        |       |
| HNRPK (Heterogeneous nuclear ribonucleoprotein K)                             | 3190   | +     |
| KHDRBS1 (KH domain-containing, RNA binding, signal transduction associated 1) | 10657  | +     |
| SF3B4 (Splicing factor 3b, subunit 4, 49 kDa)*                                | 10262  | +     |
| TIA1 (TIA1 cytotoxic granule-associated RNA-binding protein)*                 | 7072   | +     |
| TIAL1 (TIA1 cytotoxic granule-associated RNA-binding protein-like 1)*         | 7073   | +     |
| <b>RNA binding</b>                                                            |        |       |
| GRSF1 (G-rich RNA sequence-binding factor 1)                                  | 2926   |       |
| RBPMS (RNA-binding protein with multiple splicing)                            | 11030  |       |
| <b>RNA metabolism</b>                                                         |        |       |
| DUSP11 (Dual-specificity phosphatase 11; RNA/RNP complex 1-interacting)       | 8446   | +     |
| <b>Intracellular signaling</b>                                                |        |       |
| GPRASP1 (G protein-coupled receptor-associated sorting protein 1)             | 9737   |       |
| MAPK7 (Mitogen-activated protein kinase 7)                                    | 5598   |       |
| PLSCR1 (Phospholipid scramblase 1)*                                           | 5359   | +     |
| TRAF1 (TNF receptor-associated factor 1)                                      | 7185   |       |
| <b>Proteasome</b>                                                             |        |       |
| PSMA3 (proteasome, prosome, macropain, subunit, $\alpha$ type, 3)             | 5684   | +     |
| <b>Uncharacterized</b>                                                        |        |       |
| ARL6IP4 (ADP-ribosylation-like factor 6-interacting protein 4)*               | 51329  |       |
| CALCOCO2 (Calcium binding and coiled-coil domain 2)                           | 10241  |       |
| LUC7L2 (LUC7-like 2 <i>S. cerevisiae</i> )                                    | 51631  | +     |
| RABEP1 (Rabaptin, RAB GTPase-binding effector protein 1)                      | 9135   |       |
| RPIB9 (Rap2-binding protein 9)                                                | 154661 |       |
| TDRD7 (Tudor domain containing 7)                                             | 23424  |       |

Identification of potential FAST interactors by two-hybrid system

Asterisk indicates potential interactors obtained by using a pSE1107-based human B cell cDNA library.

Interactions confirmed by coimmunoprecipitation in HEK293T cells are indicated.
