# Supplementary material
Source: PubMed Central journal article supplement (PMC2040905)

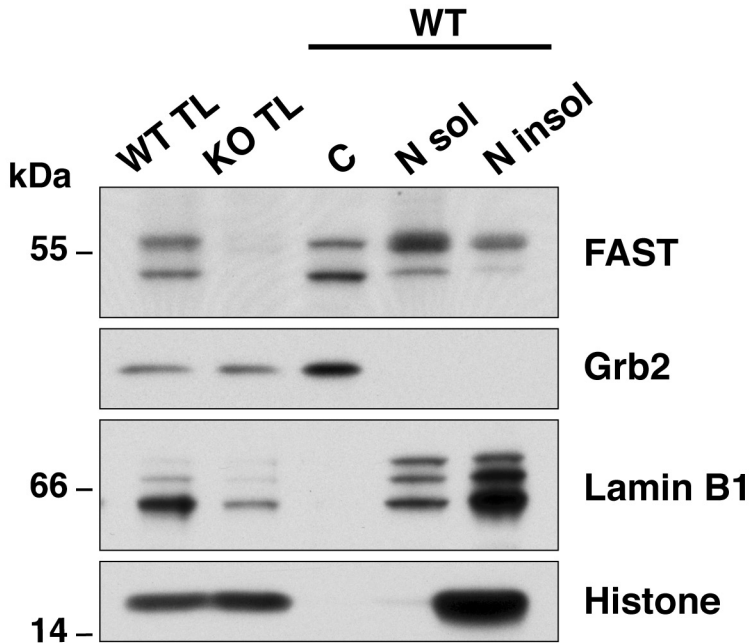

Supplement: pnas_0704964104_1.pdf [file pnas_0704964104_1.pdf]

**A**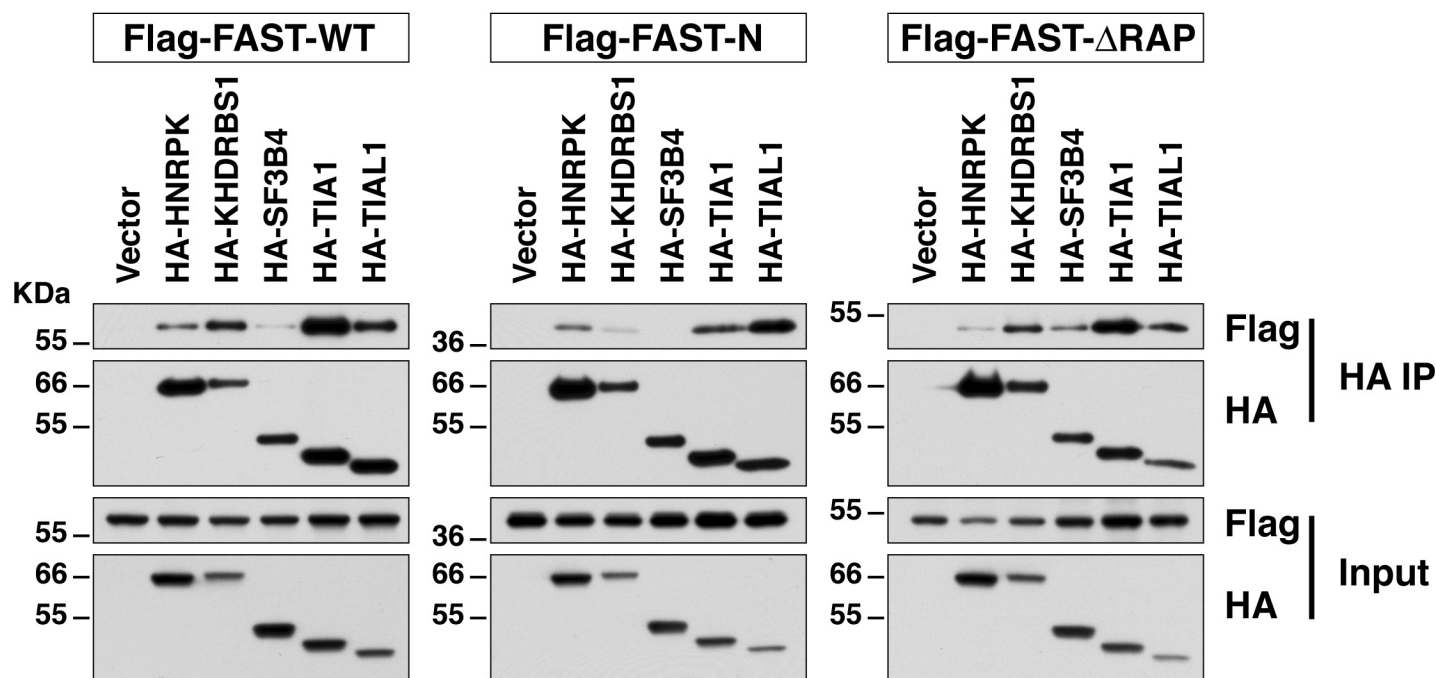**B**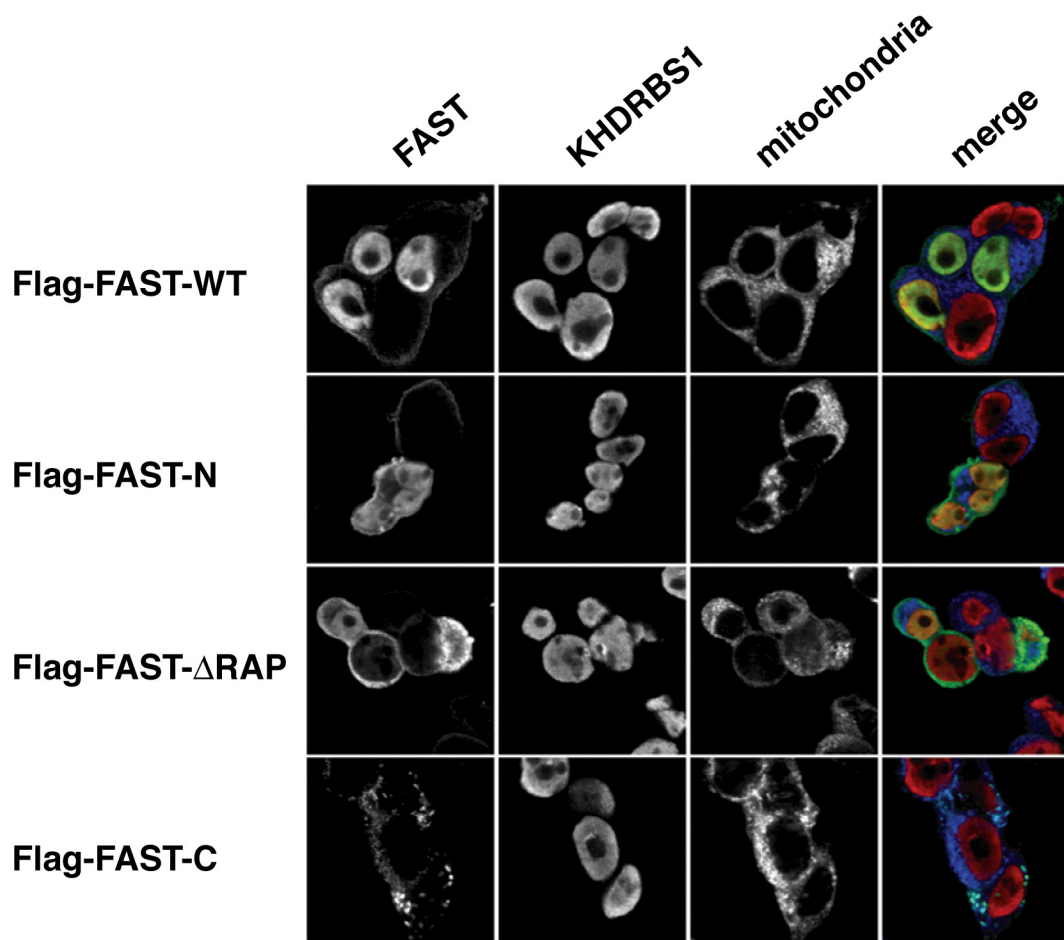

Supplement: pnas_0704964104_2.pdf [file pnas_0704964104_2.pdf]
